1 **PREDICTORS OF MORTALITY AND CLINICAL CHARACTERISTICS AMONG**  
2 **CARBAPENEM-RESISTANT OR CARBAPENEMASE-PRODUCING**  
3 **ENTEROBACTERIACEAE BLOODSTREAM INFECTION IN SPANISH**  
4 **CHILDREN**

5 **María Fátima Ara-Montojo<sup>1</sup>, Luis Escosa-García PhD<sup>1</sup>, Marina Alguacil<sup>2</sup>, Nieves**  
6 **Seara<sup>2</sup>, Carlos Zozaya<sup>3</sup>, Diego Plaza<sup>4</sup>, Cristina Schuffelmann-Gutiérrez<sup>5</sup>, Ángela de la**  
7 **Vega<sup>6</sup>, Carlota Fernández-Cambor<sup>7</sup>, Esther Ramos-Boluda<sup>8</sup>, María Pilar Romero-**  
8 **Gómez<sup>2</sup>, Guillermo Ruiz-Carrascoso PhD<sup>2</sup>, Itsaso Losantos-García<sup>9</sup>, María José**  
9 **Mellado-Peña PhD<sup>1</sup>, Rosa Gómez-Gil<sup>2</sup>.**

10 1. Paediatric Tropical and Infectious Diseases, Department of Paediatrics, Hospital  
11 Universitario La Paz, Madrid, Spain.

12 2. Department of Microbiology, Hospital Universitario La Paz, Madrid, Spain.

13 3. Department of Neonatology, Hospital Universitario La Paz, Madrid, Spain.

14 4. Department of Paediatric Hematology and Oncology, Hospital Universitario La Paz,  
15 Madrid, Spain.

16 5. Paediatric Intensive Care Unit, Hospital Universitario La Paz, Madrid, Spain.

17 6. Department of Hepatology and Liver Transplantation, Hospital Universitario La Paz,  
18 Madrid, Spain.

19 7. Department of Nephrology and Kidney Transplantation, Hospital Universitario La Paz,  
20 Madrid, Spain.

21 8. Paediatric Intestinal Rehabilitation and Bowel Transplantation, Hospital Universitario  
22 La Paz, Madrid, Spain.

23 9. Department of Biostatistics, Hospital Universitario La Paz, Madrid, Spain.

24

25

26 **María Fátima Ara-Montojo and Luis Escosa-García contributed equally to this**  
27 **article and both should be considered first author.**

28 **María Fátima Ara-Montojo.** Servicio de pediatría hospitalaria, enfermedades infecciosas  
29 y tropicales. Hospital Universitario La Paz. Paseo de la Castellana 261, C.P. 28046.  
30 Madrid, Spain.

31 Telephone number: 0034 917277479.

32 E-mail: fatiaramon@gmail.com

33 **Luis Escosa-García.** Servicio de pediatría hospitalaria, enfermedades infecciosas y  
34 tropicales. Hospital Universitario La Paz. Paseo de la Castellana 261, C.P. 28046. Madrid,  
35 Spain.

36 Telephone number: 0034 917277479.

37 E-mail: luisescosa1983@gmail.com

38 **Running title:** “Carbapenem-resistant or carbapenemase-producing Enterobacteriaceae  
39 bloodstream infection in Spanish children”

40 **Funding:** This work was not economical supported by any institution.

41 **Transparency declarations:** None to declare.

42

43

44

45

46

47

48

49

50

51 **Synopsis**

52 **Background:** Carbapenem-resistant Enterobacteriaceae (CRE) are a growing problem in  
53 pediatric population worldwide with high mortality rates (18.5-52%) in bloodstream  
54 infection (BSI).

55 **Objectives:** The aim of this study is to evaluate predictors of 30-day mortality in CRE BSI  
56 in a pediatric cohort.

57 **Methods:** Retrospective observational single-center study (December 2005 - August 2018)  
58 was conducted. CRE BSI in children 0 to 16 years were included. Microbiological  
59 identification (MALDI Biotyper) and antimicrobial susceptibility testing (Vitek2® and  
60 MicroScan panel NBC44) according to current EUCAST breakpoints were performed.  
61 PCR OXVIKP® was used to confirm carbapenemases genes (OXA-48, VIM, KPC,  
62 NDM). Demographic characteristics, underlying diseases, source of bacteremia,  
63 antimicrobial therapy and outcomes were collected from medical records. Survival analysis  
64 to establish predictors of 30 day-mortality was performed.

65 **Results:** Thirty-eight cases were included, 76.3% hospital-acquired infections and 23.7%  
66 related to healthcare. All patients had underlying comorbidity and 52.6% had received a  
67 transplant. VIM-carbapenemase was the predominant mechanism (92%). Previous CRE  
68 colonization or infection rate was 52.6%. Gut (26%) and vascular catheter (21%) were the  
69 predominant sources of infection. Crude mortality within 30 days was 18.4% (7/38);  
70 directly related 30-day mortality was 10.5%. Conditions associated with an increment in  
71 30-day mortality were intensive care admission and inadequate empiric therapy ( $p<0.05$ ).  
72 Combination antibiotic targeted treatment and a low meropenem MIC were not related to  
73 improved survival.

74 **Conclusions:** CRE BSI mortality rate is high. The most important factor related to 30-day  
75 survival in our CRE BSI cohort in children was success in empiric treatment with at least  
76 one active antibiotic.

77

78

79

80

81

82

83

84

85

86

87

88

89

90

91

92

93

94

95

96

97 **Introduction**

98 Carbapenem-resistant Enterobacteriaceae (CRE) infections are a growing problem in  
99 pediatric population worldwide. In recent years, an increment in the number of cases has  
100 been reported in many countries.<sup>1-2</sup> Some risk factors have been identified in previous  
101 studies, including underlying comorbidity, immunosuppression, previous central venous  
102 catheter, endotracheal intubation and prior antibiotic exposure.<sup>3,4</sup>

103 CRE infections in children have been associated with high mortality rates, up to 52%,  
104 probably due to delays in appropriate antibiotic therapy, lack of available active antibiotics  
105 against CRE, underlying conditions and illness severity.<sup>5</sup> Therefore, treatment of CRE  
106 infections is a real challenge for clinicians and pediatric antibiotic pipeline is limited. Some  
107 studies in adults suggested that carbapenem-containing combination therapy was  
108 associated with improved survival in severe invasive infections due to CRE.<sup>6,7</sup> Due to the  
109 lack of studies in children, data to guide management has been extrapolated from adult  
110 literature. Current recommendation in pediatrics is combination therapy of at least two  
111 agents with in vitro activity in most scenarios, until more available data and experience  
112 with newer betalactam agents.<sup>8-10</sup> To improve management of CRE infections in pediatric  
113 population it is necessary to evaluate if combination therapy is associated with lower  
114 mortality rates than monotherapy for all scenarios.

115 The aim of this study is to evaluate risk factors for CRE bacteremia and independent  
116 predictors of mortality (up to 30 days) related to the infection in a pediatric cohort.

117

118

119

120

121 **Patients and Methods**

122 *Study design*

123 A retrospective observational single-center study was conducted.

124 *Setting*

125 Hospital Universitario La Paz (HULP) Children's Hospital is a tertiary hospital with 256  
126 hospitalization beds belonging to the Spanish Health National System, serving more than  
127 45,000 children's emergency and more than 8,000 children's hospital admissions per year  
128 in Northern Madrid (Spain). It has a 16-bed pediatric intensive care unit (PICU) and a 23-  
129 bed neonatal intensive care unit (NICU), being the National Referral Hospital for pediatric  
130 transplantation.

131 *Inclusion and exclusion criteria*

132 Episodes of bloodstream infection (BSI) in children 0 to 16 years of age that showed the  
133 growth of CRE were included from December 2005 to August 2018. CRE isolate was  
134 defined as any Enterobacteriaceae non-susceptible to meropenem (MIC > 8 mg/L),  
135 imipenem (MIC > 2 mg/L) or ertapenem (MIC > 0.5 mg/L), or if carbapenemase  
136 production was documented.<sup>11</sup> Polymicrobial bacteremia episodes were excluded.

137 *Variables and Data Collection*

138 We collected demographic characteristics, reason for admission and diagnosis, underlying  
139 diseases, source of bacteremia, empirical and targeted antimicrobial therapy and outcomes  
140 from medical records. Hospital's Microbiology department provided microbiological data.

141 *Definitions*

142 BSI was classified as hospital-acquired, community-acquired or healthcare-associated  
143 (HCA) according to classic and modified CDC criteria. Episodes of community-acquired

144 bacteremia were further classified as healthcare-associated (HCA) if any of the following  
145 criteria were present: <sup>12</sup> 48-hours hospital admission during the previous 90 days, receipt of  
146 hemodialysis, intravenous medication or home wound care in the previous 30 days or  
147 residence in a nursing home or long-term care facility.

148 Classification as sepsis or septic shock was performed according to definitions of the  
149 International Consensus Conference on Pediatric Sepsis. <sup>13</sup>

150 The primary source of bacteremia was determined by the clinical presentation and/or by  
151 the evidence of an identical strain cultured near to or on the same date as the onset of BSI  
152 from other body site. To classify an infection as catheter-related BSI the 2009 Infectious  
153 Diseases Society of America (IDSA) Guidelines criteria were used. <sup>14</sup> When the source of  
154 bacteremia could not be identified, it was classified as primary bacteremia.

155 According to Hsu AJ et al. recommendations, antimicrobial therapy was considered  
156 “microbiologically appropriate” if the patient received one active agent against the isolate  
157 (MIC within the susceptible range) and “clinically adequate” if the patient received a  
158 combination of two active antibiotics at a right dose and route according to source of  
159 infection. <sup>8</sup> Use of imipenem or meropenem (MIC  $\leq$  8 mcg/ml) was considered adequate if  
160 high-dosed (25 mg/kg q6h for imipenem, 40 mg/kg over 3 hours q8h for meropenem),  
161 adjusted to renal function, and associated with a second microbiologically active agent.

#### 162 *Bacterial isolates and microbiological work-up*

163 Blood cultures were incubated in the Bactec automated blood culture device (BACTEC™,  
164 Becton Dickinson, Franklin Lakes, NJ, USA) and BacT/ALERT® (bioMérieux, Marcy  
165 l’Etoile, France) blood culture bottle systems. All positive blood cultures were routinely  
166 subcultivated on three agar plates: sheep blood agar, chocolate blood agar and *Brucella*  
167 blood agar.

168 Identification was performed by MALDI Biotyper (Bruker Daltonik GmbH, Bremen,  
169 Germany) and antimicrobial susceptibility testing (AST) was performed using the  
170 automated system Vitek2®, (bioMérieux Marcy l'Etoile, France) and MicroScan panel  
171 NBC44 (Beckman Coulter) according to European Committee on Antimicrobial  
172 Susceptibility Testing (EUCAST) breakpoint.<sup>15</sup> Isolates were tested for extended spectrum  
173 beta-lactamases (ESBL) production using E-test ESBL stripes (bioMérieux) and the  
174 double-disk synergy test with aztreonam and amoxicillin/clavulanic acid. Isolates having a  
175 MIC > 1 mg/L to imipenem or meropenem and > 0.5 mg/L to ertapenem were confirmed  
176 by PCR (OXA-48, VIM, KPC, NDM specific primers) with OXVIKPN® real time PCR  
177 kit (Progenie Molecular, Spain).

178 Genetic relationships between isolates were determined by multilocus-sequence typing and  
179 automated repetitive-sequence-based PCR in *Klebsiella pneumoniae* using the  
180 DiversiLab® (bioMérieux) system.

#### 181 *Outcome parameters*

182 Primary outcome was death within 30 days after the first positive CRE blood culture.  
183 Relationship between death and BSI episode (directly related or not directly related) was  
184 established by two independent investigators, by reviewing hospital medical records.

#### 185 *Statistical analysis*

186 Categorical variables were presented as absolute frequencies and percentages. Continuous  
187 variables were presented as the mean or median, with its standard deviation or ranges,  
188 respectively. Categorical variables were compared using chi-square test or Fisher's Exact  
189 test, as appropriate. Continuous variables were compared by Student's t test or Mann-  
190 Whitney U test according to their distribution. Univariate analysis was conducted to  
191 evaluate different possible factors related to mortality. The survival analysis was carried



192 out by means of the Kaplan-Meier analysis and "log-rank test" was performed to compare  
193 survival functions. A two-tailed  $P$  value  $< 0.05$  was considered statistically significant. All  
194 statistical analysis was performed using SAS 9.3 (SAS Institute, Cary, NC, USA).

#### 195 *Ethics*

196 HULP Institutional Review Board evaluated and approved the study protocol. All collected  
197 data were anonymized. Given its observational retrospective design, written informed  
198 consent was waived.

199

## 200 **Results**

### 201 *Clinical and epidemiological characteristics*

202 Of 2842 positive blood cultures in children during the study period, 928 (32.7%) were  
203 Enterobacteriaceae and 38 (1.3%) were CRE isolates that met inclusion criteria (Table 1).  
204 Most cases were detected between 2010 and 2015 (73.6%). Mean age was 2.2 years (DS  
205 3.2, range 0-14.5) and patients were predominantly female (55.3%).

206 No community-acquired cases were detected. Twenty-nine (76.3%) cases were hospital-  
207 acquired infections and 9 (23.7%) were related to healthcare.

208 In regard to underlying conditions, 20 patients (52.6%) had received a transplant. Solid  
209 organ transplant was documented in 13 (9 liver, 3 multivisceral and 1 kidney), an allogenic  
210 hematopoietic stem cell transplantation in 6 patients and 1 patient had received both  
211 (multivisceral and allogeneic hematopoietic stem cell transplantation). Other medical  
212 conditions were: heart disease (5/38, 13.2%), neurological (4/38; 10.5%), respiratory (4/38,  
213 10.5%), urological (3/38, 7.9%), digestive (3/38, 7.9%) and malignancy (one hematologic  
214 and one solid organ tumor). Fourteen (36.8%) patients were born prematurely.

215 At the time of bacteremia, 51.7% of patients with hospital-acquired disease were  
216 hospitalized in intensive care units (8 in PICU, 7 in NICU), 41.4% in a medical ward and  
217 6.9% were in a surgical ward (Post-Anesthesia Care Unit).

218 The rate of previous antibiotic exposure, indwelling devices and other possible risk factors  
219 for CRE infection are shown in Table 2.

220 Regarding the source of bacteremia, the intestinal tract was found to be the most common  
221 origin causing 11 cases (26.3%), followed by central venous catheter-related bacteremia in  
222 8 (21.1%) and hepatobiliary origin in 6 (5.8%) patients. Three (7.9%) children had urinary  
223 tract infection and one patient had a peritoneal catheter-related infection. Only one patient  
224 had ventilator-associated pneumonia. The origin remained unknown in 8 (21.1%) cases.

225 As per severity of disease, 32 (84.2%) patients with CRE BSI met systemic inflammatory  
226 response syndrome (SIRS) criteria of which 8 (21.1%) presented as septic shock.

### 227 *Microbiological results*

228 The isolated bacteria, resistance mechanisms and susceptibility to antimicrobials are shown  
229 in Table 3.

### 230 *Treatment and outcomes*

231 Crude mortality within 30 days from onset of BSI was 18.4% (7/38). Death was considered  
232 directly related to the BSI episode in 10.5% of total cases, based on clinical judgment.

233 Before antibiotic susceptibility test results, 10 (26.3%) children received microbiologically  
234 inappropriate empiric therapy (no active antibiotic) while the remaining 28 (73.7%)  
235 patients were treated with at least one active antibiotic. In 23 (60.5%) cases a carbapenem

236 was used before knowing antibiotic susceptibilities. Median duration of empiric treatment  
237 was 3 days (IQR 2-5). Optimal early source control was performed in 23.7% (9/38).

238 Thirty-six (94.7%) patients received microbiologically appropriate targeted therapy and 15  
239 of them (39.5%) were clinically adequately treated with at least two active antibiotics, at a  
240 proper dosage and route according to the source of infection.

241 In univariate analysis, we found a significantly higher mortality rate in patients admitted to  
242 neonatal and intensive care units at the time of BSI onset. Including one active antibiotic in  
243 the empiric therapy showed to decrease mortality risk in a 92.4% compared to non-active  
244 antibiotic (HR 0.076; IC 95% 0.012-0.494). There was no difference in survival depending  
245 on meropenem MIC and neither between patients who received meropenem as empiric  
246 therapy and those who not. Attending targeted treatment, we did not find differences when  
247 monotherapy was used versus combination therapy and the use of meropenem did not  
248 prove to improve survival either (Table 4, Figure 1).

249

## 250 **Discussion**

251 In the present study, we report 38 cases of CRE bacteremia in pediatric population. To the  
252 best of our knowledge, this is the largest current pediatric cohort reported in Europe.

253 Novel agents (ceftazidime-avibactam, aztreonam-avibactam, cefiderocol, etc.) were not  
254 available during the study period, so only classical therapeutic agents were used. VIM-type  
255 metallo-beta-lactamases were the predominant resistance mechanism in our series, as they  
256 were present in 35 of the 38 strains. These VIM-type enzymes were first discovered in  
257 Europe in the 1990s and have been reported worldwide in the recent multidrug-resistant  
258 Enterobacteriaceae crisis, although the Mediterranean basin and the Middle East are the  
259 predominant areas.<sup>16</sup> Most of our cases (73.6%) were detected between 2010 and 2015,

260 due to a VIM 1 *Klebsiella pneumoniae* ST- 54 outbreak during 2010 and an OXA-48  
261 *Klebsiella pneumoniae* ST-11 outbreak in 2012. Antimicrobial stewardship program  
262 initiatives in children emerged in 2014 in our hospital, primarily focused on PICU patients  
263 so we only found one CRE BSI after 2015.

264 All episodes of infection in our study were either hospital-acquired or associated with  
265 healthcare as in other similar series.<sup>3,17</sup> Regarding risk factors of CRE BSI, we found that  
266 those children who developed CRE BSI had multiple comorbidities, most of them (52.6%)  
267 had received a transplant since our hospital is National Referral Hospital for pediatric  
268 transplantation. Of note, 94.7% of patients were carriers of indwelling devices. In addition,  
269 they often had exposure to carbapenems in the previous 6 months (50%).

270 The 30-day mortality rate in our study (18.4%) is not as high as compared with previous  
271 reports, ranged from 18.5 to 52%.<sup>5,18-20</sup> Grouping data from those reports and our cohort,  
272 mortality rate is 31.8% in pediatric CRE bacteremia, although important differences  
273 between series are obvious, including different resistance mechanisms or bacteremia  
274 severity. For instance, our lower mortality rate could be related to the relatively low rate of  
275 severe bacteremia in our series (21.1% had septic shock) and also to the fact that many  
276 strains were susceptible to aminoglycosides (81.6%), offering therapeutic options. In India,  
277 Nabarro et al. found a mortality rate of 52%, but resistance to aminoglycosides in their  
278 cohort was up to 90%.<sup>5</sup> In a recent study in Chinese pediatric population with  
279 carbapenem-resistant *K.pneumoniae* BSI, mortality rate was similar than ours in relation to  
280 low clinical severity and hematological malignancies predominance whose empirical  
281 therapy used to be more effective in covering multidrug-resistant bacteria.<sup>18</sup> In a meta-  
282 analysis of carbapenem-resistant *K. pneumoniae* infections, mortality was not shown to be  
283 lower in VIM-producing compared to KPC. Therefore it is unlikely that the VIM  
284 predominant resistance mechanism in our cohort explains our lower mortality rate.<sup>21</sup>

285 We have found a relationship between increased 30 day-mortality and inadequate  
286 empirical antibiotic therapy (no active agent), as was shown in previous studies.<sup>22</sup> A recent  
287 report by Lodise et al. has established that delayed appropriate therapy may be a more  
288 important driver of outcomes than CRE itself.<sup>23</sup> However, Zhang et al. did not identify an  
289 association between non-active empirical antibiotic agents and mortality in children.<sup>18</sup> Of  
290 note, 52.6% of patients in our cohort had been colonized or infected by a CRE before, as  
291 systematic CRE colonization screening in our hospital is performed since 2010 in many  
292 units. In adults, Girmenia et al. showed a rate of CRE infection in previously colonized-  
293 patients of 10% for immunocompetent, 25% for those with neutropenia, 26% for auto-SCT  
294 (stem cells transplant) and 39% for allo-SCT.<sup>24</sup> In our pediatric hospital, an infection rate  
295 of 13% has been established in patients with previous VIM-type CRE colonization<sup>25</sup>, but  
296 from our knowledge no pediatric data has set which colonized children are at a higher risk  
297 to develop an infection. As many patients in our cohort were previously CRE colonized  
298 and active antibiotic in empiric therapy showed to decrease mortality risk in a 92.4%  
299 compared to non-active antibiotic, antimicrobial stewardship guided antibiogram in  
300 colonized stools from selected highly-risk patients might be an interesting strategy to  
301 improve CRE BSI prognosis. However, rapid diagnostic testing aiming to reduce the time  
302 to effective therapy in antimicrobial stewardship programs would be the most desirable  
303 approach.<sup>26</sup>

304 Patients admitted to neonatal units and to intensive care units also had significant higher  
305 mortality rates in our cohort. Of note, in our survival analysis, there was no evidence of  
306 higher mortality in patients with isolated *Klebsiella* spp. strains. No source of infection  
307 showed relation to mortality either. Relationship between meropenem MIC and increased  
308 mortality has previously been described in adults and Nabarro and Zhang also found  
309 statistically increased mortality rate in pediatric patients with CRE BSI with a meropenem

310 MIC > 8mg/L.<sup>5,18</sup> Nevertheless, in our cohort meropenem MIC > 8 was not predictive of  
311 higher mortality. Empiric antibiotic therapy that included meropenem was also no  
312 protective in Zhang's et al. report. Regarding the use of aminoglycosides as empiric  
313 treatment, we did not find differences in mortality either.

314 In adults, retrospective observational studies have suggested improved survival in patients  
315 receiving combinations of two or more in vitro active antibiotics, mostly among patients  
316 with a high probability of death.<sup>6</sup> These data have been extrapolated to children with a  
317 number of authors suggesting use of combination antibiotics in CRE.<sup>8</sup> The few pediatric  
318 series so far show controversy in this aspect. In our study, targeted treatment with  
319 combinations of two or more active agents did not lead to higher survival than  
320 monotherapy, as has been shown in a recent clinical trial in adults, where combination  
321 therapy was not superior to monotherapy.<sup>27</sup> However, most infections in Paul et al. trial  
322 (77%) were caused by *Acinetobacter baumannii* so CRE might have been under-  
323 represented. The inclusion of meropenem in the targeted therapy also showed no survival  
324 improvement in our cohort.

325 Our study has some limitations. It is a retrospective study of a single cohort from just one  
326 center so the sample size is limited, although it is the largest pediatric series reported in  
327 Europe so far. This may have influenced the statistical power to identify risk factors and  
328 predictors of mortality. Moreover, the high proportion of VIM-producing  
329 Enterobacteriaceae in our cohort leads to results that may not be representative for all  
330 CRE. Regarding surveillance analysis, our low mortality rate decreases the reliability of  
331 results and we have not used severity scores. Nevertheless, given the scarcity of literature  
332 on this important subject, mostly in Western Europe, we believe it offers useful insights  
333 into the management of CRE BSI in children.

334 The findings of this study suggest CRE BSI are a growing problem in pediatric patients  
335 with comorbidities and underlying devices. The independent factor more related to 30-day  
336 mortality in our cohort was success in empiric treatment with at least one active antibiotic.  
337 Antimicrobial stewardship strategies focusing on the adequacy of empiric therapy are  
338 needed in CRE BSI. Combination antibiotic targeted treatment and a low Meropenem MIC  
339 were not related to improved survival in our cohort but sample size might limit these  
340 findings.

341

#### 342 **Funding**

343 This work was not economical supported by any institution.

344

#### 345 **Transparency declarations**

346 María Fátima Ara-Montojo and Luis Escosa-García contributed equally to this article and  
347 both should be considered first author. We have nothing to declare.

348

349

350

351

352

353

354 **Bibliography**

- 355 1. Montagnani C, Prato M, Scolfaro C, et al. Carbapenem-resistant enterobacteriaceae  
356 infections in children: An Italian retrospective multicenter study. *Pediatr Infect Dis*  
357 *J.* 2016;35(8):862-868. doi:10.1097/INF.0000000000001188
- 358 2. Logan LK, Renschler JP, Gandra S, Weinstein RA LR. Carbapenem-Resistant  
359 Enterobacteriaceae in Children, United States, 1999–2012. *Emerg Infect Dis.*  
360 2015;21(11):2014-2021. doi:10.3201/eid2111.150548
- 361 3. Díaz A, Ortiz DC, Trujillo M, Garcés C, Jaimes F, Restrepo AV. Clinical  
362 characteristics of carbapenem-resistant *Klebsiella pneumoniae* infections in ill and  
363 colonized children in Colombia. *Pediatr Infect Dis J.* 2016;35(3):237-241.  
364 doi:10.1097/INF.0000000000000987
- 365 4. Chiotos K, Tamma PD, Flett KB, et al. Multicenter study of the risk factors for  
366 colonization or infection with carbapenem-resistant Enterobacteriaceae in children.  
367 *Antimicrob Agents Chemother.* 2017;61(12):1-9. doi:10.1128/AAC.01440-17
- 368 5. Nabarro LEB, Shankar C, Pragasam AK, et al. Clinical and Bacterial Risk Factors  
369 for Mortality in Children with Carbapenem-resistant Enterobacteriaceae  
370 Bloodstream Infections in India. *Pediatr Infect Dis J.* 2017;36(6):e161-e166.  
371 doi:10.1097/INF.0000000000001499
- 372 6. Gutiérrez-Gutiérrez B, Salamanca E, de Cueto M, et al. Effect of appropriate  
373 combination therapy on mortality of patients with bloodstream infections due to  
374 carbapenemase-producing Enterobacteriaceae (INCREMENT): a retrospective  
375 cohort study. *Lancet Infect Dis.* 2017;17(7):726-734. doi:10.1016/S1473-  
376 3099(17)30228-1



- 377 7. Daikos GL, Tsaousi S, Tzouveleki LS, et al. Carbapenemase-producing *Klebsiella*  
378 pneumoniae bloodstream infections: Lowering mortality by antibiotic combination  
379 schemes and the role of carbapenems. *Antimicrob Agents Chemother.*  
380 2014;58(4):2322-2328. doi:10.1128/AAC.02166-13
- 381 8. Hsu AJ, Tamma PD. Treatment of multidrug-resistant gram-negative infections in  
382 children. *Clin Infect Dis.* 2014;58(10):1439-1448. doi:10.1093/cid/ciu069
- 383 9. Chiotos K, Hayes M, Gerber JS, Tamma PD. Treatment of Carbapenem-Resistant  
384 Enterobacteriaceae Infections in Children. 2019;(Xx Xxxx):1-11.  
385 doi:10.1093/jpids/piz085
- 386 10. Aguilera-Alonso D1, Escosa-García L2, Saavedra-Lozano J3, Cercenado E4 B-AF.  
387 Carbapenem-Resistant Gram-Negative Bacterial Infections in Children. *Antimicrob*  
388 *Agents Chemother.* 2020;64(3). doi:10.1128/AAC.02183-19
- 389 11. Centers for Disease Control and Prevention. CDC. Facility Guidance for Control of  
390 Carbapenem-resistant Enterobacteriaceae (CRE). *Natl Cent Emerg Zoonotic Infect*  
391 *Dis.* 2014;(November):24.  
392 [https://www.osha.gov/SLTC/ebola/control\\_prevention.html](https://www.osha.gov/SLTC/ebola/control_prevention.html).
- 393 12. Friedman ND, Kaye KS, Stout JE, McGarry SA, Trivette SL, Briggs JP et al.  
394 Health care--associated bloodstream infections in adults: a reason to change the  
395 accepted definition of community-acquired infections. *Ann Intern Med [Internet].*  
396 2002;137(10):791-797. doi:10.7326/0003-4819-137-10-200211190-00007
- 397 13. Glodstein, B., Giroir, B., & Randolph A. International pediatric sepsis consensus  
398 conference: definitions for sepsis and organ dysfunction in pediatrics. *Pediatr Crit*  
399 *Care Med.* 2005;6(1):96.

- 400 14. FA M. IDSA guidelines for the diagnosis and management of intravascular catheter-  
401 related bloodstream infection. *Clin Infect Dis*. 2009;49(11):1770-1771.  
402 doi:10.1086/648112
- 403 15. EUCAST Breakpoint tables v 8.1. [http://www.eucast.org/clinical\\_breakpoints/](http://www.eucast.org/clinical_breakpoints/).  
404 Published 2018.
- 405 16. Cornaglia G, Giamarellou H, Rossolini GM. Metallo- $\beta$ -lactamases: A last frontier  
406 for  $\beta$ -lactams? *Lancet Infect Dis*. 2011;11(5):381-393. doi:10.1016/S1473-  
407 3099(11)70056-1
- 408 17. Malande OO, Du Plessis A, Rip D, Bamford C, Eley B. Invasive carbapenem-  
409 resistant Enterobacteriaceae infection at a paediatric hospital: A case series. *South*  
410 *African Med J*. 2016;106(9):877. doi:10.7196/SAMJ.2016.v106i9.11028
- 411 18. Zhang Y, Guo LY, Song WQ, Wang Y, Dong F, Liu G. Risk factors for  
412 carbapenem-resistant *K. pneumoniae* bloodstream infection and predictors of  
413 mortality in Chinese paediatric patients. *BMC Infect Dis*. 2018;18(1):1-10.  
414 doi:10.1186/s12879-018-3160-3
- 415 19. Maltezou HC, Kontopidou F, Katerelos P, Daikos G, Roilides E, Theodoridou M.  
416 Infections caused by carbapenem-resistant gram-negative pathogens in hospitalized  
417 children. *Pediatr Infect Dis J*. 2013;32(4):151-154.  
418 doi:10.1097/INF.0b013e3182804b49
- 419 20. Ozsurekci Y, Aykac K, Cengiz AB, et al. Bloodstream infections in children caused  
420 by carbapenem-resistant versus carbapenem-susceptible gram-negative  
421 microorganisms: Risk factors and outcome. *Diagn Microbiol Infect Dis*.  
422 2017;87(4):359-364. doi:10.1016/j.diagmicrobio.2016.12.013

- 423 21. Xu L, Sun X, Ma X. Systematic review and meta-analysis of mortality of patients  
424 infected with carbapenem-resistant *Klebsiella pneumoniae*. *Ann Clin Microbiol*  
425 *Antimicrob*. 2017;16(1):1-12. doi:10.1186/s12941-017-0191-3
- 426 22. Micozzi A, Gentile G, Minotti C, et al. Carbapenem-resistant *Klebsiella pneumoniae*  
427 in high-risk haematological patients: Factors favouring spread, risk factors and  
428 outcome of carbapenem-resistant *Klebsiella pneumoniae* bacteremias. *BMC Infect*  
429 *Dis*. 2017;17(1):1-12. doi:10.1186/s12879-017-2297-9
- 430 23. Lodise T, Sciences H, Bonine NG, et al. Antimicrobial Resistance or Delayed  
431 Appropriate Therapy—Does One Influence Outcomes More Than the Other among  
432 Patients with Serious Infections due to Carbapenem-Resistant Versus Carbapenem-  
433 Susceptible Enterobacteriaceae? *Open Forum Infect Dis*. 2019;ofz194(Major  
434 Article).
- 435 24. Girmenia C, Rossolini GM, Piciocchi A, et al. Infections by carbapenem-resistant  
436 *Klebsiella pneumoniae* in SCT recipients: A nationwide retrospective survey from  
437 Italy. *Bone Marrow Transplant*. 2015;50(2):282-288. doi:10.1038/bmt.2014.231
- 438 25. González-rubio R, Parra-blázquez D, San-juan-sanz I, Ruiz-carrascoso G, Gallego  
439 S, Escosa-garcía L. Original Evolución de la incidencia de pacientes con  
440 colonización e infección por bacterias productoras de carbapenemasas VIM en un  
441 hospital pediátrico en España. 2019;32(1):60-67.
- 442 26. Timbrook TT, Morton JB, Mcconeghy KW, Caffrey AR, Mylonakis E, Laplante  
443 KL. The Effect of Molecular Rapid Diagnostic Testing on Clinical Outcomes in  
444 Bloodstream Infections □: A Systematic Review and Meta-analysis. 2017;64:15-23.  
445 doi:10.1093/cid/ciw649

446 27. Paul M, Daikos GL, Durante-Mangoni E, et al. Colistin alone versus colistin plus  
447 meropenem for treatment of severe infections caused by carbapenem-resistant  
448 Gram-negative bacteria: an open-label, randomised controlled trial. *Lancet Infect*  
449 *Dis.* 2018;18(4):391-400. doi:10.1016/S1473-3099(18)30099-9

450

451

452

453

454

455

456

457

458

459

460

461

462

463

464

465

466

|    | Age at admission | Sex | Department                | Bacteremia | Microorganism        | Source           | Carbapenem Resistance | ESBL | Exitus at 30th day | Sepsis /shock | Days from admission to BSI | Days from BSI to discharge / death | Empirical Treatment (ACTIVE AGAINST GRAM NEGATIVE BACTERIA) | Targeted Treatment                   |
|----|------------------|-----|---------------------------|------------|----------------------|------------------|-----------------------|------|--------------------|---------------|----------------------------|------------------------------------|-------------------------------------------------------------|--------------------------------------|
| 1  | 5 m              | F   | Post-anesthesia Care Unit | HA         | <i>K. pneumoniae</i> | Gut              | VIM                   | ☐    | A                  | ☐             | 106                        | 392                                | Meropenem                                                   | Meropenem + Amikacin + Ciprofloxacin |
| 2  | 4 m              | M   | Post-anesthesia Care Unit | HA         | <i>K. pneumoniae</i> | Catheter related | VIM                   |      | †                  |               | 22                         | 3                                  | Meropenem + Amikacin                                        | Meropenem + Amikacin                 |
| 3  | 4 y              | M   | Hepatology Ward           | HCA        | <i>K. oxytoca</i>    | Hepatobiliar     | VIM                   |      | A                  | ☐             | 0                          | 21                                 | Cefotaxime                                                  | Meropenem + Amikacin                 |
| 4  | 5 m              | M   | PICU                      | HA         | <i>C. freundii</i>   | Hepatobiliar     | VIM                   |      | A                  |               | 17                         | 95                                 | Meropenem + Amikacin                                        | Meropenem + Amikacin                 |
| 5  | 14 m             | F   | Hepatology Ward           | HA         | <i>K. pneumoniae</i> | Hepatobiliar     | VIM                   | ☐    | A                  | ☐             | 110                        | 152                                | Meropenem                                                   | Meropenem + Amikacin                 |
| 6  | 3 y              | F   | PICU                      | HA         | <i>K. pneumoniae</i> | Hepatobiliar     | VIM                   | ☐    | A                  | ☐             | 51                         | 30                                 | Gentamicin + Ciprofloxacin                                  | Ciprofloxacin                        |
| 7  | 3 m              | M   | PICU                      | HA         | <i>K. pneumoniae</i> | Catheter related | VIM                   |      | A                  | ☐             | 29                         | 5                                  | None                                                        | Amikacin                             |
| 8  | 3 y              | F   | Hepatology Ward           | HA         | <i>S. ureilytica</i> | Gut              | VIM                   | ☐    | A                  |               | 126                        | 23                                 | Cefepime + Colistin                                         | Ciprofloxacin                        |
| 9  | 4 m              | M   | Neonatal Unit             | HA         | <i>K. pneumoniae</i> | Unknown          | VIM                   |      | †                  | ☐             | 109                        | 22                                 | Meropenem + Amikacin                                        | Meropenem + Amikacin                 |
| 10 | 2 m              | F   | Neonatal Unit             | HA         | <i>K. pneumoniae</i> | Unknown          | Porins resistance     | ☐    | A                  | ☐             | 355                        | 70                                 | Meropenem                                                   | Meropenem + Amikacin                 |
| 11 | 18 d             | M   | Neonatal Unit             | HA         | <i>K. pneumoniae</i> | Gut              | VIM                   |      | †                  | ☐             | 2                          | 3                                  | Cefotaxime + Meropenem                                      |                                      |
| 12 | 59 d             | F   | Neonatal Unit             | HA         | <i>K. pneumoniae</i> | Unknown          | OXA-48                | ☐    | †                  | ☐             | 59                         | 22                                 | Cefotaxime                                                  | Amikacin                             |
| 13 | 5 m              | M   | Neonatal Unit             | HA         | <i>E. cloacae</i>    | Gut              | VIM                   |      | A                  | ☐             | 150                        | 22                                 | Amikacin                                                    | Amikacin                             |
| 14 | 75 d             | M   | Neonatal Unit             | HA         | <i>K. pneumoniae</i> | UTI              | OXA-48                | ☐    | A                  | ☐             | 75                         | 226                                | Meropenem                                                   | Meropenem + Amikacin                 |
| 15 | 6 m              | M   | PICU                      | HA         | <i>S. marcescens</i> | Pulmonary        | VIM                   |      | A                  |               | 4                          | 18                                 | Cefotaxime                                                  | Cefotaxime + Gentamicin + Aztreonam  |
| 16 | 17 m             | F   | Haemato-oncology Ward     | HA         | <i>S. marcescens</i> | Unknown          | VIM                   |      | A                  | ☐             | 8                          | 17                                 | Meropenem + Amikacin                                        | Meropenem + Amikacin                 |
| 17 | 7 m              | F   | Haemato-oncology Ward     | HA         | <i>k. pneumoniae</i> | Unknown          | VIM                   |      | A                  |               | 21                         | 375                                | Meropenem + Amikacin                                        | Meropenem + Amikacin                 |
| 18 | 14 y             | M   | Haemato-oncology Ward     | HA         | <i>E. cloacae</i>    | Unknown          | VIM                   | ☐    | A                  | ☐             | 60                         | 31                                 | Cefepime + Meropenem                                        | Amikacin + Ciprofloxacin             |
| 19 | 10 y             | F   | Haemato-oncology Ward     | HA         | <i>E. cloacae</i>    | Gut              | VIM                   |      | A                  | ☐             | 36                         | 17                                 | Meropenem + Cefepime                                        | Meropenem + Ciprofloxacin            |
| 20 | 3 y              | M   | Haemato-oncology Ward     | HA         | <i>K. oxytoca</i>    | Gut              | VIM                   | ☐    | A                  |               | 1                          | 7                                  | Cefixime, Cefotaxime                                        | Ciprofloxacin                        |
| 21 | 7 m              | M   | General Paediatrics Ward  | HA         | <i>K. pneumoniae</i> | Catheter related | VIM                   | ☐    | A                  | ☐             | 19                         | 21                                 | Meropenem                                                   | Ciprofloxacin                        |
| 22 | 8 m              | F   | PICU                      | HA         | <i>K. pneumoniae</i> | Peritonitis      | VIM                   | ☐    | A                  | ☐             | 143                        | 4                                  | Meropenem                                                   | Meropenem + Colistin                 |
| 23 | 4 y              | F   | Haemato-oncology Ward     | HA         | <i>E. cloacae</i>    | Unknown          | VIM                   |      | A                  | ☐             | 60                         | 42                                 | Cefepime + Amikacin                                         | Ciprofloxacin + Amikacin             |
| 24 | 4 y              | M   | Gastroenterology Ward     | HCA        | <i>E. coli</i>       | Catheter related | VIM                   |      | A                  | ☐             | 0                          | 38                                 | Meropenem + Amikacin                                        | Meropenem + Amikacin                 |
| 25 | 2 y              | M   | Nephrology Ward           | HA         | <i>K. pneumoniae</i> | UTI              | VIM                   | ☐    | A                  | ☐             | 6                          | 12                                 | Amikacin + Ceftazidime                                      | Amikacin + Ciprofloxacin             |
| 26 | 2 y              | M   | Hepatology Ward           | HA         | <i>E. cloacae</i>    | Hepatobiliar     | VIM                   |      | A                  | ☐             | 48                         | 176                                | Meropenem + Amikacin                                        | Amikacin + Ciprofloxacin             |
| 27 | 2 y              | F   | PICU                      | HA         | <i>E. cloacae</i>    | Pulmonary        | VIM                   |      | A                  | ☐             | 26                         | 45                                 | Meropenem + Amikacin                                        | Meropenem + Amikacin + Ciprofloxacin |
| 28 | 10 m             | F   | Gastroenterology Ward     | HCA        | <i>E. aerogenes</i>  | Catheter related | VIM                   |      | A                  | ☐             | 1                          | 22                                 | Meropenem + Gentamicin                                      | Gentamicin + Aztreonam               |
| 29 | 6 m              | M   | PICU                      | HA         | <i>K. pneumoniae</i> | Hepatobiliar     | VIM                   | ☐    | A                  | ☐             | 63                         | 64                                 | Meropenem + Colistin                                        | Colistin + Fosfomycin                |

|    |      |   |                         |     |                      |                              |     |   |   |   |     |    |                                |                                      |
|----|------|---|-------------------------|-----|----------------------|------------------------------|-----|---|---|---|-----|----|--------------------------------|--------------------------------------|
| 30 | 4 y  | M | Gastroenterology Ward   | HCA | <i>K. pneumoniae</i> | Catheter related             | VIM |   | A | ☒ | 0   | 50 | Amikacin                       | Amikacin + Aztreonam                 |
| 31 | 15 m | M | Nephrology Ward         | HCA | <i>K. pneumoniae</i> | Peritoneal dialysis catheter | VIM |   | A | ☒ | 1   | 8  | Meropenem + Amikacin           | Amikacin + Aztreonam                 |
| 32 | 16 y | M | PICU                    | HCA | <i>K. pneumoniae</i> | Gut                          | VIM |   | † | ☒ | 4   | 2  | Cefepime + Amikacin + Colistin | Colistin + Aztreonam + Fosfomycin    |
| 33 | 4 y  | M | General Pediatrics Ward | HCA | <i>K. pneumoniae</i> | Gut                          | VIM |   | A | ☒ | 0   | 16 | Meropenem + Amikacin           | Amikacin                             |
| 34 | 22 m | M | Haemato-oncology Ward   | HA  | <i>K. pneumoniae</i> | Catheter related             | VIM | ☒ | A | ☒ | 226 | 41 | Meropenem                      | Imipenem + Amikacin + Ciprofloxacin  |
| 35 | 2 y  | F | Haemato-oncology Ward   | HCA | <i>K. pneumoniae</i> | Catheter related             | VIM |   | A | ☒ | 0   | 14 | Cefepime                       | Amikacin + Ciprofloxacin             |
| 36 | 9 y  | F | PICU                    | HA  | <i>K. oxytoca</i>    | Gut                          | VIM |   | † | ☒ | 50  | 2  | Meropenem + Amikacin           | Meropenem + Ciprofloxacin + Colistin |
| 37 | 10 m | F | Emergency Department    | HCA | <i>K. oxytoca</i>    | UTI                          | VIM |   | A | ☒ | -1  | 5  | Amikacin + Fosfomycin          | Cotrimoxazole                        |
| 38 | 5 m  | F | Neonatal Unit           | HA  | <i>S. marcescens</i> | Unknown                      | VIM |   | † | ☒ | 175 | 30 | Ciprofloxacin                  | Ciprofloxacin                        |

467

468 **TABLE 1.** Clinical features of patients with bacteremia due to CRE. Months (m), female (F), hospital-  
469 acquired (HA), alive (A), exitus (†), male (M), years (y), health care associated (HCA), days (d), urinary tract  
470 infection (UTI).

471

472

473

474

475

476

477

478

479

480

481

482

483

484

485

486

487

488

489

490

| <b>Risk factor</b>                                               | <b>N (%)</b> | <b>491</b>         |
|------------------------------------------------------------------|--------------|--------------------|
|                                                                  |              | <b>Total N: 38</b> |
| Any antibiotic exposure (30 previous days)                       | 32 (84.2)    | 492                |
| Cephalosporin exposure (30 previous days)                        | 19 (50)      | 493                |
| Carbapenem exposure (6 previous months)                          | 19 (50)      |                    |
| Admission to a unit with previous CRE cases (12 previous months) | 14 (36.8)    | 494                |
| Previous colonization or infection by CRE                        | 20 (52.6)    | 495                |
| Surgery                                                          | 18 (47.4)    | 496                |
| Central venous catheter                                          | 35 (92.1)    |                    |
| Urinary catheter                                                 | 20 (52.6)    | 497                |
| Drainage tube                                                    | 12 (31.5)    | 498                |
| Parenteral nutrition                                             | 26 (77)      |                    |
| Mechanical ventilation                                           | 18 (47.4)    | 499                |
| Neutropenia                                                      | 5 (13.2)     | 500                |
| Renal failure                                                    | 9 (23.7)     |                    |

501

502 **TABLE 2.** Risk factors related to CRE bacteremia.

503

504

505

506

507

508

509

510

511

512

513

514

| Strain                               |                               | AZT       | ERT     | IMI    | MER    | COL      | AK      | CIP      | TYG      | FOS     |
|--------------------------------------|-------------------------------|-----------|---------|--------|--------|----------|---------|----------|----------|---------|
|                                      | <i>K. pneumoniae</i> VIM (18) | Range MIC | ≤1 - >8 | 1 ->1  | 2 - >8 | ≤1 ->8   | ≤0.5->4 | ≤2 ->32  | ≤0,5 ->2 | ≤1 - >4 |
|                                      | S (%)                         | 50        | 0       | 11.1   | 44.4   | 83.3     | 72.2    | 61.1     | 77.7     | 83.3    |
| <i>K. pneumoniae</i> OXA-48 ESBL (2) | Range MIC                     | >16       | >1      | 2-8    | 2-8    | ≤0.5     | ≤2      | >2       | 4        | >64     |
|                                      | S (%)                         | 0         | 0       | 50     | 50     | 100      | 100     | 0        | 0        | 0       |
| <i>K. pneumoniae</i> ESBL (1)        | MIC                           | >16       | >1      | 8      | 8      | ≤0.5     | ≤2      | >2       | ≤1       | ≤16     |
|                                      | S (%)                         | 0         | 0       | 0      | 0      | 100      | 100     | 0        | 100      | 100     |
| <i>E. cloacae</i> VIM (6)            | Range MIC                     | ≤1 - >8   | ≤0.5->1 | 4 - >8 | ≤1 ->8 | ≤0.5 ->4 | ≤2      | ≤0.5 - 1 | ≤1       | ≤16     |
|                                      | S (%)                         | 66.6      | 50      | 16.6   | 50     | 66.6     | 100     | 66.6     | 100      | 83.3    |
| <i>K. oxytoca</i> VIM (4)            | Range MIC                     | ≤1->32    | >32     | ≤1->8  | ≤1->8  | ≤0.5     | ≤2->32  | ≤0,5     | ≤1       | ≤32->64 |
|                                      | S (%)                         | 50        | 0       | 25     | 50     | 100      | 75      | 100      | 100      | 25      |
| <i>S. marcescens</i> VIM (3)         | Range MIC                     | ≤1        | >1      | >8     | >8     | >2       | ≤2      | ≤0,5     | ≤1       | ≤32->64 |
|                                      | S (%)                         | 100       | 0       | 0      | 0      | 0        | 100     | 100      | 66.6     | 66.6    |
| <i>E.coli</i> VIM (1)                | MIC                           | ≤1        | 1       | 8      | 8      | ≤0.5     | ≤2      | ≤0.5     | ≤1       | 32      |
|                                      | S I R                         | S         | I       | I      | I      | S        | S       | S        | S        | S       |
| <i>C. freundii</i> VIM (1)           | MIC                           | ≤1        | >1      | >8     | >8     | ≤0.5     | ≤2      | ≤0.5     | ≤1       | ≤16     |
|                                      | S I R                         | S         | R       | R      | R      | S        | S       | S        | S        | S       |
| <i>S. ureilytica</i> VIM (1)         | MIC                           | >8        | 1       | >8     | 2      | >4       | ≤2      | ≤0,5     | ≤1       | 32      |
|                                      | S I R                         | R         | I       | R      | S      | R        | S       | S        | S        | S       |
| <i>E. aerogenesa</i> VIM (1)         | MIC                           | >8        | 1       | >8     | 2      | >4       | ≤2      | ≤0,5     | ≤1       | 32      |
|                                      | S I R                         | R         | I       | R      | S      | R        | S       | S        | S        | S       |
| <b>ALL (38)</b>                      | S (%)                         | 55.3      | 7.9     | 13.2   | 39.5   | 73.6     | 84.2    | 68.4     | 81.6     | 71.1    |
|                                      | I (%)                         | 2.6       | 7.9     | 36.8   | 34.2   | ---      | ---     | ---      | 7.9      | ---     |
|                                      | R (%)                         | 42.1      | 84.2    | 50     | 26.3   | 26.3     | 15.8    | 31.6     | 10.5     | 28.9    |

515

516 **TABLE 3.** Resistance of strains to antimicrobials agents. "MIC" is the Minimum Inhibitory  
517 Concentration acquired in mg/L; "Range MIC" is the range of Minimum Inhibitory Concentration; "S" stands  
518 for susceptible; "I" for intermediate and "R" for resistant, as interpreted according to the EUCAST V 6.0  
519 guidelines. "AZT" for aztreonam, "ERT" for ertapenem, "IMI" for imipenem, "MER" for meropenem, "COL"  
520 for colistin, "AK" for amikacin, "CIP" for ciprofloxacin, "TYG" for tygeciline, "FOS" for fosfomycin.

521

522



| <b>Variable</b>                                        | <b>Survived<br/>N=31 (%)</b> | <b>Died<br/>N=7 (%)</b> | <b>Hazard ratio<br/>(95% CI)</b> | <b>P</b>     |
|--------------------------------------------------------|------------------------------|-------------------------|----------------------------------|--------------|
| Median Age (months)                                    | 17.64                        | 4.32                    |                                  |              |
| Male (%)                                               | 54.84                        | 57.14                   |                                  |              |
| Klebsiella isolated                                    | 19 (61.29)                   | 6 (85.71)               |                                  | NS           |
| Source of infection:                                   |                              |                         |                                  |              |
| Intestinal or hepatobiliary tracts                     | 13 (41.94)                   | 3 (42.86)               |                                  | NS           |
| Catheter-related                                       | 7 (22.58)                    | 1 (14.29)               |                                  | NS           |
| Urinary tract                                          | 3 (9.68)                     | 0 (0)                   |                                  | NS           |
| Pulmonary                                              | 2 (6.45)                     | 0 (0)                   |                                  | NS           |
| Peritoneal catheter                                    | 1 (3.23)                     | 0 (0)                   |                                  | NS           |
| Unknown                                                | 5 (16.13)                    | 3 (42.86)               |                                  | NS           |
| Neonatal unit admission                                | 3 (9.68)                     | 4 (57.14)               | 0.197 (0.111-0.956)              | <b>0.017</b> |
| Intensive care unit admission                          | 10 (32.26)                   | 6 (85.71)               | 0.13 (0-0.984)                   | <b>0.024</b> |
| Presentation as sepsis                                 | 26 (83.87)                   | 6 (85.71)               |                                  | NS           |
| Presentation as septic shock                           | 5 (16.13)                    | 3 (42.86)               |                                  | NS           |
| Meropenem MIC >8 mg/L                                  | 8 (25.81)                    | 2 (28.57)               |                                  | NS           |
| Optimal early source control                           | 8 (25.81)                    | 1 (14.29)               |                                  | NS           |
| No-active antibiotic in empiric therapy                | 6 (19.35)                    | 4 (57.14)               | 0.076 (0.012-0.494)              | <b>0.001</b> |
| Meropenem in empiric therapy                           | 19 (61.29)                   | 4 (57.14)               |                                  | NS           |
| Aminoglycoside in empiric therapy                      | 15 (48.39)                   | 4 (57.14)               |                                  | NS           |
| Non-clinically adequately or improvable target therapy | 19 (61.29)                   | 3/6 (50)*               |                                  | NS           |
| Monotherapy in target treatment                        | 16 (51.61)                   | 3/6 (50)*               |                                  | NS           |
| Meropenem in target therapy                            | 14 (45.16)                   | 4/6 (66.66)*            |                                  | NS           |

523

524 **TABLE 4.** Univariate analysis of risk factor associated with 30-day mortality. The survival analysis was  
525 carried out by means of the Kaplan-Meier analysis and "log-rank test" was performed to compare the

526 survival functions. A two-tailed P value < 0.05 was considered statistically significant. Non-significant (NS).  
527 \*One patient excluded because of death before knowing antibiogram.

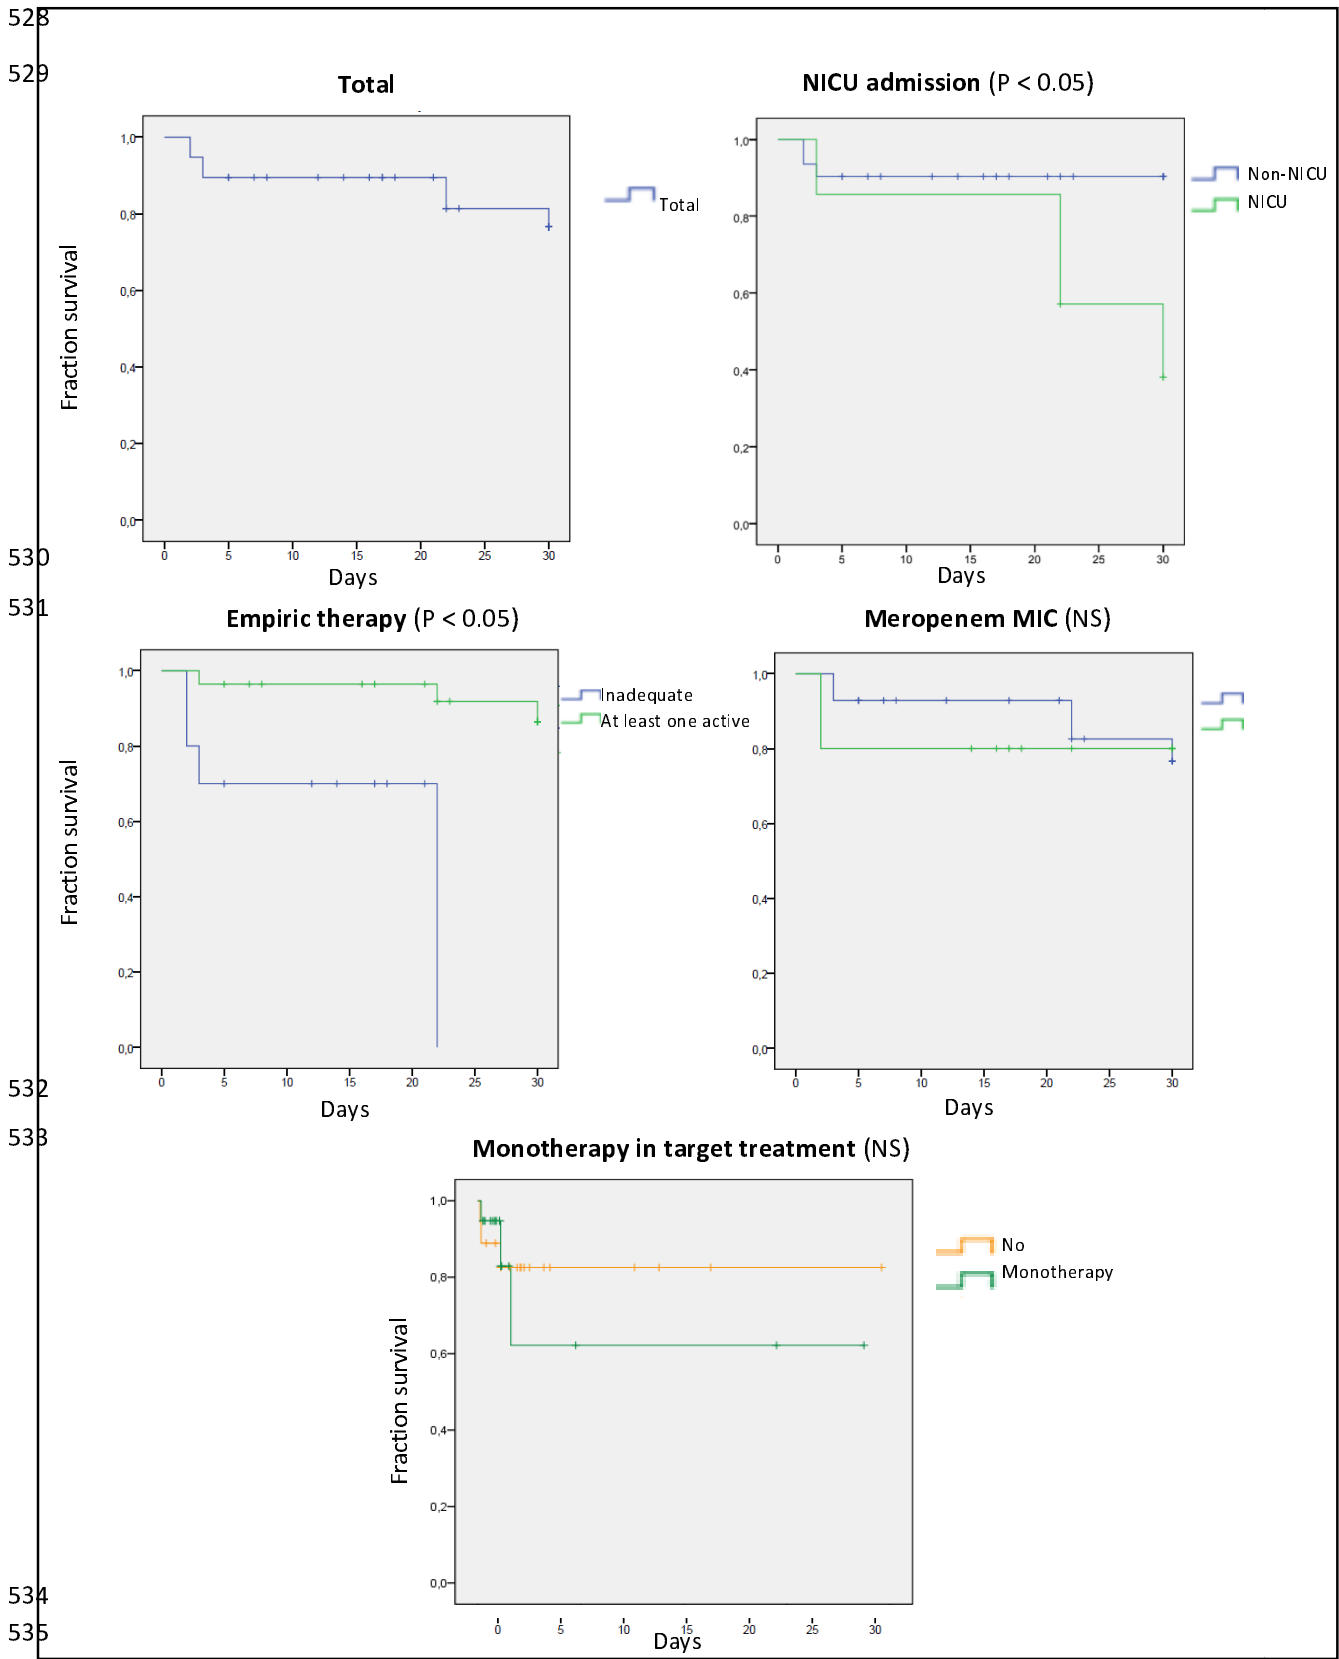

536 **FIGURE 1.** Kaplan-Meier curves of different factors and survival at 30 days in patients with CRE  
537 bacteremia. Non-significant (NS); Minimum Inhibitory Concentration (MIC)
